# Supplementary material for: Relative colour cues improve colour constancy in birds
Source: Oxford University Press journal article supplement (doi:10.1242/jeb.155424), 2017-01-01
Supplement: jeb155424supp.pdf [file jeb155424supp.pdf]

## Supplementary figures

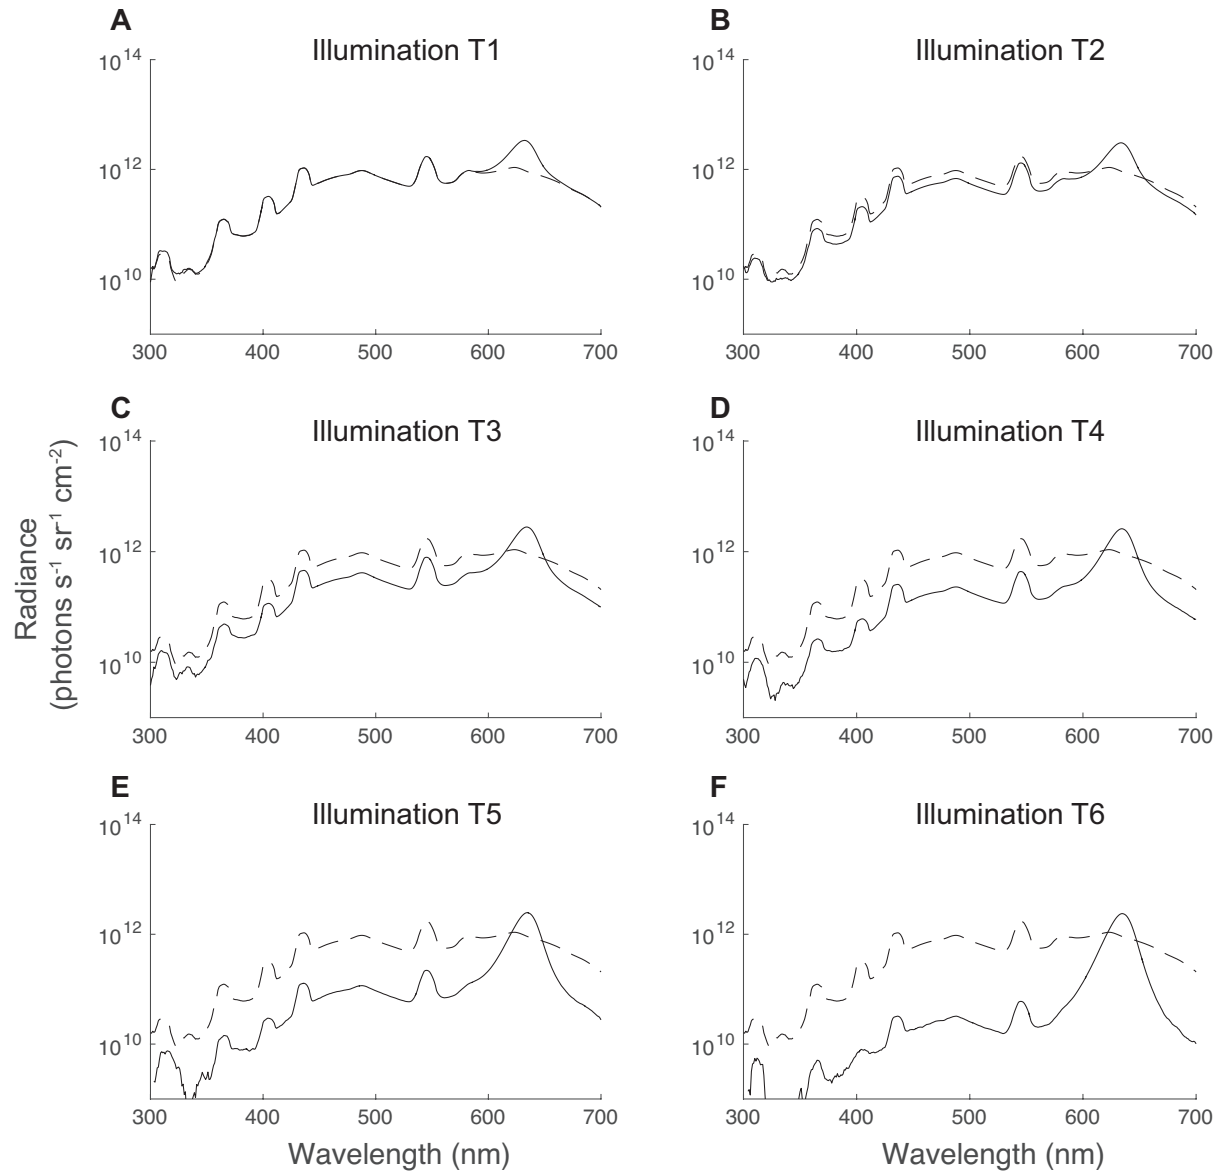

**Fig. S1. Spectral radiance of all illuminations.** The radiance of the illuminations as measured from a white standard placed on the floor of the experimental arena. The white control illumination is plotted as a dashed line in all panels.

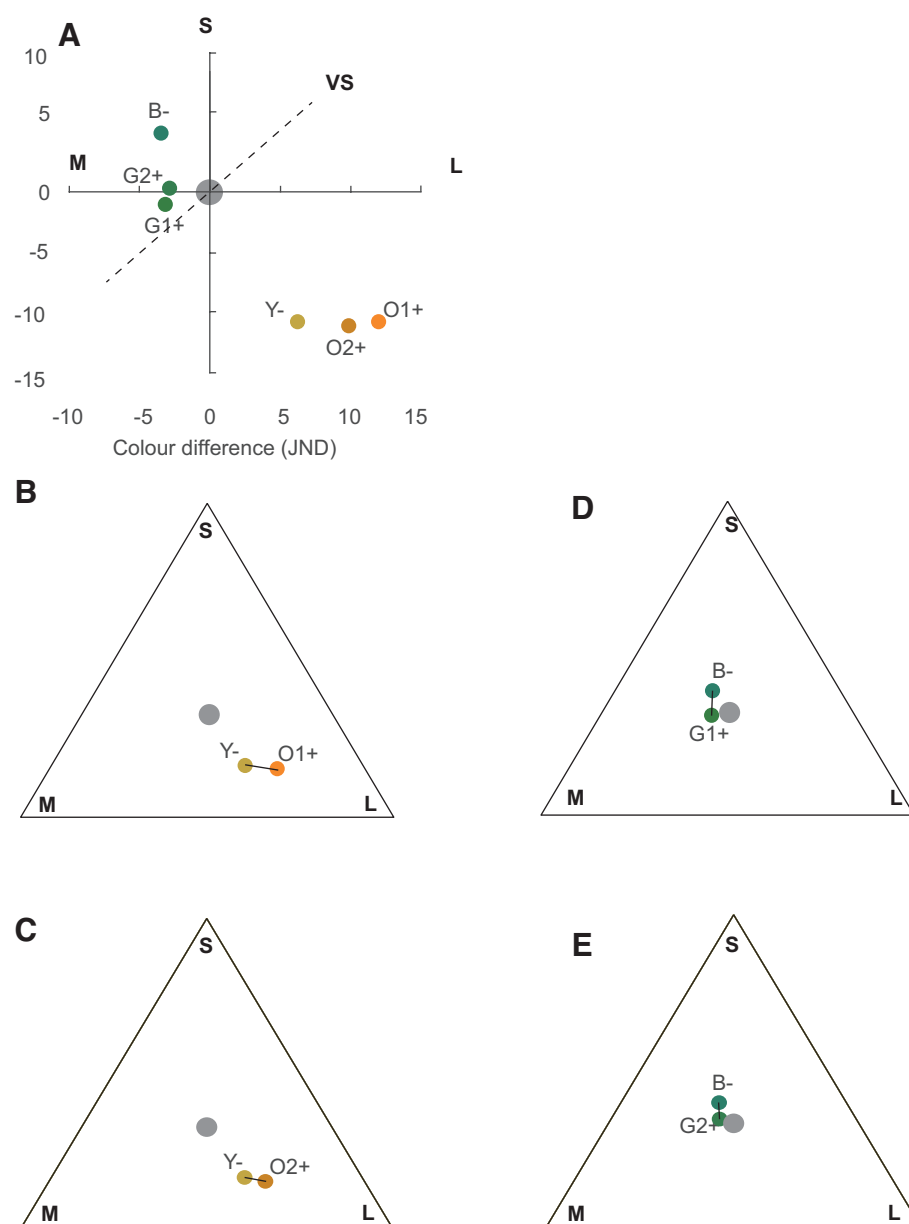

**Fig. S2. Chromaticity diagram of the stimuli from experiment 2.** (A) Chromaticity diagram of illuminations calculated using the receptor noise limited model (Renoult et al., 2015; Vorobyev and Osorio, 1998). (B) Chromaticity diagram of the large colour difference of the orange-yellow stimuli in experiment, adapted to the grey background in the white illumination. (C) Chromaticity diagram of the small colour difference of the orange-yellow stimuli in experiment, adapted to the grey background in the white illumination. (D) Chromaticity diagram of the large colour difference of the green-blue stimuli in experiment, adapted to the grey background in the white illumination. (E) Chromaticity diagram of the large colour difference of the green-blue stimuli in experiment, adapted to the grey background in the white illumination.

## References

- Olsson, P., Wilby, D. and Kelber, A.** (2016). Quantitative studies of animal colour constancy: using the chicken as model. *Proc. R. Soc. B* **283**, 20160411.
- Renoult, J. P., Kelber, A. and Schaefer, M. H.** (2015). Colour spaces in ecology and evolutionary biology. *Biol. Rev.* n/a–n/a.
- Vorobyev, M. and Osorio, D. C.** (1998). Receptor noise as a determinant of colour thresholds. *Proc. R. Soc. B* **265**, 351–358.
